# Supplementary material for: An Investigative, Cooperative Learning Approach to the General Microbiology Laboratory
Source: Atypon-hosted journal article supplement (doi:10.1187/cbe.09-02-0011), 2009-06-01
Supplement: suppa.pdf [file suppa.pdf]

## Appendix A. A typical sequence of lab activities/experiments.

| Date   | Activities                                                                                                                                                                                                        | Pages in lab manual       | Data Sheet Pages          | Assignment Given                                                                                                         | Assignment Due                                                                                           | Quiz                                     |
|--------|-------------------------------------------------------------------------------------------------------------------------------------------------------------------------------------------------------------------|---------------------------|---------------------------|--------------------------------------------------------------------------------------------------------------------------|----------------------------------------------------------------------------------------------------------|------------------------------------------|
| Lab 1  | No class                                                                                                                                                                                                          |                           |                           |                                                                                                                          |                                                                                                          |                                          |
| Lab 2  | lab safety; course design, notebook description, etc. assign unk group, photos, ubiquity exp. (demonstrate simple streak)                                                                                         | 1-8, 27-29                |                           | (Individual) Research what you might expect to find in the environment your group has been assigned-sources, predictions |                                                                                                          |                                          |
| Lab 3  | Observe ubiquity results; observe colony morphology (ubiquity plates and controls), groups report of predictions; work on sampling protocol (get approved before leaving); give out materials needed for sampling | 9-25, 30-37               | 391-394                   | (Group) Write up sampling protocol; individual report hypothesis/observation on ubiquity. Less than 1 page single-spaced | Research what you might expect to find in the environment your group has been assigned. Report as group. | #1 (1-37)                                |
| Lab 4  | Collection and or inoculation of environmental samples; streak bacteria for isolated colonies; microscopy-- prepared slides Demonstrate different inoculation techniques. Inoculate controls different ways       |                           |                           |                                                                                                                          | Ubiquity report (Individual). Sampling protocol (discuss in lab)                                         |                                          |
| Lab 5  | (minimize number of samples): Agar slants, broth cultures - 2 per group -share the experiences. Take next step in isolating unknowns                                                                              | 63-71                     | 429-430                   |                                                                                                                          |                                                                                                          | #2 (pp 63-71, 77-85)                     |
| Lab 6  | Staining and microscopy, negative and simple stain                                                                                                                                                                | 77-85                     | 435-438                   | Individual drawings, Report on isolation and staining of unknowns (oral, group)                                          |                                                                                                          |                                          |
| Lab 7  | Gram stain - unknown and controls                                                                                                                                                                                 | 86-90                     |                           |                                                                                                                          | Individual drawings, Report on isolation and staining of unknowns (oral, group)                          | #3 (pp 86-90, 95-99)                     |
| Lab 8  | Gram staining continued, dichotomous key, Bergey's manual                                                                                                                                                         | 95-99                     |                           | Introduction to paper (Individual)                                                                                       |                                                                                                          |                                          |
| Lab 9  | Skills Test                                                                                                                                                                                                       |                           |                           |                                                                                                                          | Notebooks collected                                                                                      |                                          |
| Lab 10 | Lecture Exam                                                                                                                                                                                                      |                           |                           |                                                                                                                          |                                                                                                          |                                          |
| Lab 11 | Effect of temperature and pH on growth                                                                                                                                                                            | 49-52                     | 411-416                   |                                                                                                                          |                                                                                                          | #4 (pp 49-52, handout)                   |
| Lab 12 | PCR - rDNA                                                                                                                                                                                                        | Handout                   |                           |                                                                                                                          |                                                                                                          |                                          |
| Lab 13 | Oxygen requirements                                                                                                                                                                                               | 42-48                     | 403-410                   |                                                                                                                          | Oral report on isolation and staining of unknowns                                                        | #5 (pp 42-48, 108-110, 118-119, 193-195) |
| Lab 14 | Selective and differential media                                                                                                                                                                                  | 108-110, 118-119, 193-195 | 453-454, 461-462, 519-520 | Each group prepares 1 page report giving several possibilities for each unk ID with justification.                       | Introduction to paper (Individual)                                                                       |                                          |

|        |                                                                 |                  |                  |                                                       |                                                       |                                            |
|--------|-----------------------------------------------------------------|------------------|------------------|-------------------------------------------------------|-------------------------------------------------------|--------------------------------------------|
| Lab 15 | Biochemical and physiological tests                             |                  |                  | Materials and Methods, Results for paper (Individual) | Notebooks collected                                   | #6 (pp 136-140, 177-180, 141-144, 196-197) |
| Lab 16 | Biochemical and physiological tests                             | 141-144, 196-197 | 477-480, 521-522 |                                                       |                                                       |                                            |
| Lab 17 | Lecture Exam                                                    |                  |                  |                                                       |                                                       |                                            |
| Lab 18 | In-class discussion of progress with unknown ID                 |                  |                  |                                                       | Group report on possible IDs for unknowns (written)   |                                            |
| Lab 19 | Antibiotic sensitivity                                          | 242-244          | 559-560          |                                                       |                                                       | #7 (pp 242-244, handout)                   |
| Lab 20 | Explain growth curve and serial dilutions, give plates to count | 230-232, Handout |                  |                                                       | Materials and Methods, Results for paper (Individual) |                                            |
| Lab 21 | Perform growth curve - 5-8 hr experiment                        | 230-232, Handout |                  | Dilution scheme and quantitation (Individual)         |                                                       | # 8                                        |
| Lab 22 | Discuss growth curve                                            |                  |                  | Oral report on growth curve results (group)           |                                                       |                                            |
| Lab 23 | rRNA sequence analysis - BLAST                                  |                  |                  | Posters and formal paper (group)                      |                                                       |                                            |
| Lab 24 | Lecture Exam                                                    |                  |                  |                                                       |                                                       |                                            |
| Lab 25 | TBD                                                             |                  |                  |                                                       |                                                       |                                            |
| Lab 26 | TBD                                                             |                  |                  |                                                       |                                                       |                                            |
| Lab 27 | TBD                                                             |                  |                  |                                                       | Paper (group), Notebooks (Individual)                 |                                            |
| Lab 28 | Poster Presentations                                            |                  |                  |                                                       |                                                       |                                            |

---
