# Supplementary material for: An Investigative, Cooperative Learning Approach to the General Microbiology Laboratory
Source: Atypon-hosted journal article supplement (doi:10.1187/cbe.09-02-0011), 2009-06-01
Supplement: suppd.pdf [file suppd.pdf]

## Appendix D

### Peer Evaluation of Participation in POSTER Production

Distribute 15 points in any allocation among your other three group members. All 15 points must be distributed based on your estimation of their contribution to the poster (not the entire semester's work, just the poster). For example, if one person did 40% of the work, and the other two did 30% each, then the distribution should be 6, 4.5, and 4.5, respectively. If their contributions were equal, give each person 5 points.

Your name: \_\_\_\_\_

| GROUP MEMBER NAME | POINTS GIVEN |
|-------------------|--------------|
|                   |              |
|                   |              |
|                   |              |

TOTAL 15

Comments:

Please give me this evaluation as a hard copy on Thursday, December 6<sup>th</sup>. You can seal it in an envelope for privacy, if you wish.

## Peer Evaluation of Participation in PAPER Production

Distribute 15 points in any allocation among your other three group members. All 15 points must be distributed based on your estimation of their contribution to the poster (not the entire semester's work, just the poster). For example, if one person did 40% of the work, and the other two did 30% each, then the distribution should be 6, 4.5, and 4.5, respectively. If their contributions were equal, give each person 5 points.

Your name: \_\_\_\_\_

| <b>GROUP MEMBER NAME</b> | <b>POINTS GIVEN</b> |
|--------------------------|---------------------|
|                          |                     |
|                          |                     |
|                          |                     |

TOTAL 15

Comments:

## Peer Evaluation of OVERALL Participation for the entire semester

Distribute 15 points in any allocation among your other three group members. All 15 points must be distributed based on your estimation of their contribution to the poster (not the entire semester's work, just the poster). For example, if one person did 40% of the work, and the other two did 30% each, then the distribution should be 6, 4.5, and 4.5, respectively. If their contributions were equal, give each person 5 points.

Your name: \_\_\_\_\_

| GROUP MEMBER NAME | POINTS GIVEN |
|-------------------|--------------|
|                   |              |
|                   |              |
|                   |              |

TOTAL 15

Comments:
