# Supplementary material for: An Investigative, Cooperative Learning Approach to the General Microbiology Laboratory
Source: Atypon-hosted journal article supplement (doi:10.1187/cbe.09-02-0011), 2009-06-01
Supplement: suppe.pdf [file suppe.pdf]

## Appendix E

### Student Poster Evaluations

Your name \_\_\_\_\_

Poster #1 Authors: \_\_\_\_\_

Please evaluate the poster on the following criteria, using a scale of 0 – 5:

| <b>Evaluation Criteria</b>                              | <b>Grade</b> |
|---------------------------------------------------------|--------------|
| Overall appearance, organization and clarity            |              |
| Introductory & background material                      |              |
| Presentation & clarity of results                       |              |
| Figures & tables                                        |              |
| Extra effort (information provided beyond the expected) |              |
| Verbal explanations                                     |              |
| Evaluation of overall quality                           | X 2          |
| Total (out of 40 possible points)                       |              |

**What was the most interesting thing you learned?**

Poster #2 Authors: \_\_\_\_\_

Please evaluate the poster on the following criteria, using a scale of 0 – 5:

| <b>Evaluation Criteria</b>                              | <b>Grade</b> |
|---------------------------------------------------------|--------------|
| Overall appearance, organization and clarity            |              |
| Introductory & background material                      |              |
| Presentation & clarity of results                       |              |
| Figures & tables                                        |              |
| Extra effort (information provided beyond the expected) |              |
| Verbal explanations                                     |              |
| Evaluation of overall quality                           | X 2          |
| Total (out of 40 possible points)                       |              |

**What was the most interesting thing you learned**
