# Supplementary material for: An Investigative, Cooperative Learning Approach to the General Microbiology Laboratory
Source: Atypon-hosted journal article supplement (doi:10.1187/cbe.09-02-0011), 2009-06-01
Supplement: suppf.pdf [file suppf.pdf]

## **Appendix F**

### **Scoring Rubric for Purpose-Method-Results-Conclusions Reports**

#### **Purpose – 20 pts**

##### **Excellent (18-20)**

Introductory material introducing the topic in question, relevance

Hypothesis stated, specific, and complete

Information presented logically, accurately

Few grammatical errors (none if bacterial names are used)

Citations as appropriate in author, date format (Kleyn and Bicknell, 2004), (Leboffe and Pierce, 2002), and (Talaro, 2005) are most common.

##### **Proficient (16-17)**

All of above elements are present, but with a few problems

##### **Average (14-15)**

Major problems with introductory paragraph or hypothesis

Many grammatical errors

##### **Marginal (12-13)**

Major problems in multiple areas

##### **Unacceptable (0-11)**

Complete lack of understanding of experimental hypothesis

Major, repeated errors

#### **Methods – 25 pts**

##### **Excellent (22-25)**

All methods presented completely, logically

Few grammatical errors (none if bacterial names are used)

Citations as appropriate

Past tense

##### **Other categories as above**

#### **Results/Conclusions – 25 pts**

##### **Excellent (22-25)**

All results are presented completely, logically, controls (what is being controlled for?)

All tables, graphs, etc have an introductory sentence or two introducing the reader to what is being presented.

All table, graphs, etc are labeled properly and are properly referred to if in a different place in the report, for example “A summary of the results is listed in Table 1 (see attached sheet).”

Citations as appropriate  
All abbreviations are explained completely  
Few grammatical errors (none if bacterial names are used)  
Order of results reflect order presented in methods  
Past tense

**Other categories as above**

### **Discussion – 20 pts**

#### **Excellent (18-20)**

Possible sources of error if appropriate  
Few grammatical errors (none if bacterial names are used)  
Order of conclusions reflect order presented in methods and results  
A final section applying the information gathered to a “real world” scenario  
Citations as appropriate  
Appropriate tense

**Other categories as above**

### **Bibliography – 10 pts**

#### **Excellent (9-10)**

All citations are listed  
Format is complete (can have MINOR variations)  
NO WEBSITES

Examples of acceptable citations:

Kleyn, John and Mary Bicknell. 2004. Microbiology Experiments, A Health Science Perspective. 4<sup>th</sup> edition. New York, NY. McGraw Hill Companies, Inc. p. whatever-whatever.

Talaro, Kathleen. 2005. Foundations in Microbiology Basic Principles. 5<sup>th</sup> edition. New York, NY. McGraw Hill Companies, Inc. p. whatever-whatever.

Total – 100 pts
